# Supplementary material for: Iron Modulates Butyrate Production by a Child Gut Microbiota In Vitro
Source: PubMed Central journal article supplement (PMC4659462; doi:10.1128/mbio.01453-15), 2015-11-17
Supplement: mbo005152539sf2.pdf [file mbo005152539sf2.pdf]

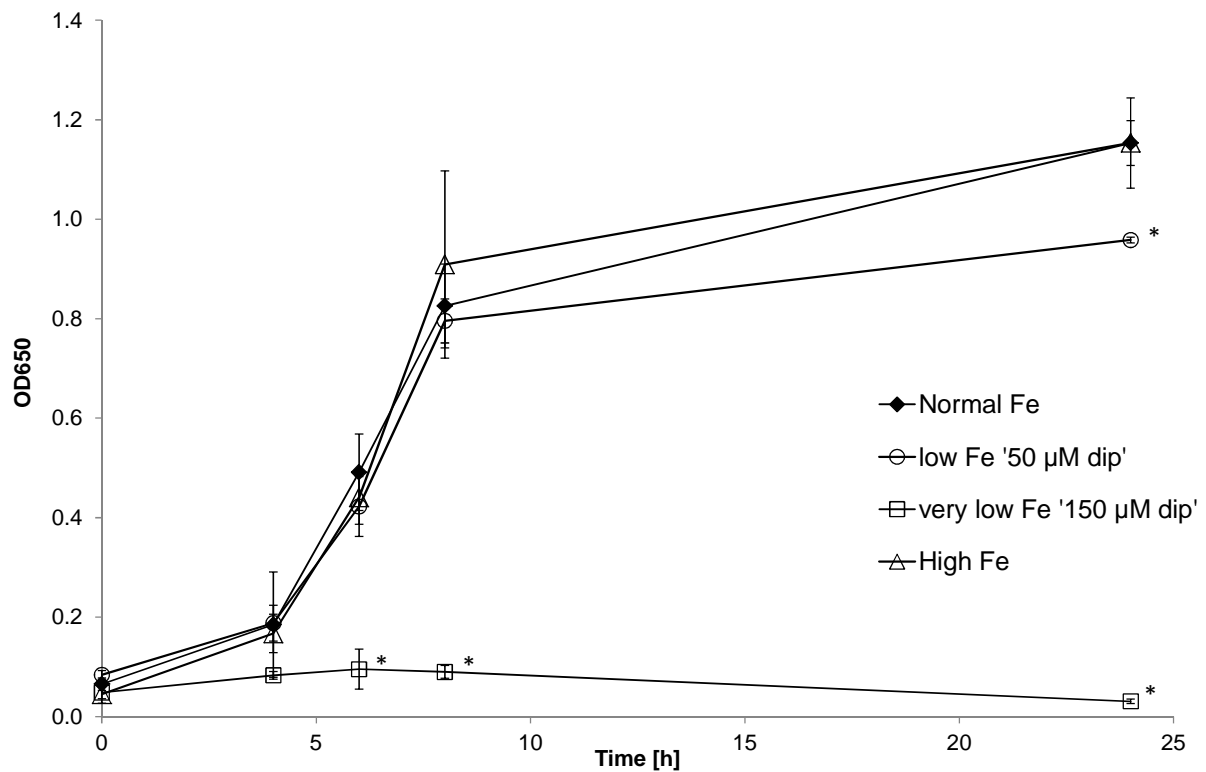

**Supplementary Figure S2:** Growth curve of *R. intestinalis* in 'Normal Fe' YCFA, low Fe '50 μM dip' YCFA or very low Fe '150 μM dip' YCFA (addition of 2,2'-dipyridyl) and 'High Fe' YCFA (25 mg Fe L<sup>-1</sup>). Values are means ± SD (n=3). Values with an asterisk (\*) are significantly different from growth under normal Fe conditions at the same timepoint,  $P < 0.05$ .
