# Supplementary material for: Iron Modulates Butyrate Production by a Child Gut Microbiota In Vitro
Source: PubMed Central journal article supplement (PMC4659462; doi:10.1128/mbio.01453-15), 2015-11-17
Supplement: mbo005152539sf3.pdf [file mbo005152539sf3.pdf]

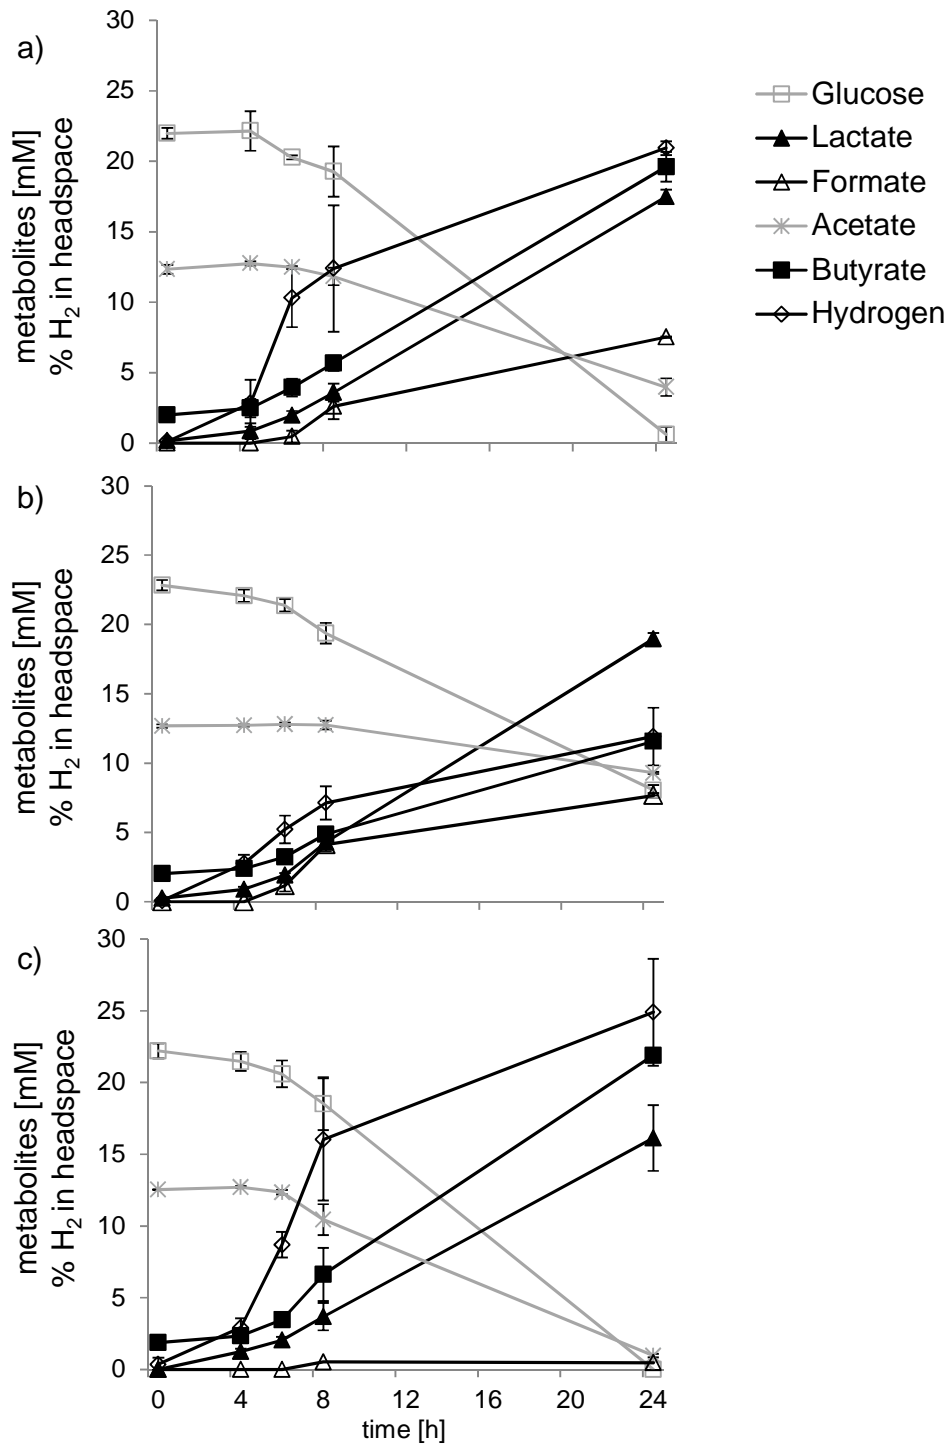

**Supplementary Figure S3:** Consumption of glucose and acetate and production of lactate, formate, butyrate and hydrogen of *R. intestinalis* in 'Normal Fe' (a), low Fe '50  $\mu$ M dip' (b) and 'High Fe' (c) YCFA medium over time. Values are means  $\pm$  SD (n=3).
