# Supplementary material for: Iron Modulates Butyrate Production by a Child Gut Microbiota In Vitro
Source: PubMed Central journal article supplement (PMC4659462; doi:10.1128/mbio.01453-15), 2015-11-17
Supplement: mbo005152539st1.pdf [file mbo005152539st1.pdf]

**Supplementary Table S1:** 16S rRNA gene concentrations ( $\log_{10}$  copy numbers  $\text{mL}^{-1}$  fermentation effluent) of specific bacterial groups and species determined by qPCR in effluent samples during 'Normal Fe' conditions in the control reactor (CR) and 'High Fe', low Fe '200  $\mu\text{M}$  dip' and very low Fe '300  $\mu\text{M}$  dip' conditions in test reactors (TR1 and TR2).

|                                    | total 16S   | <i>Bacteroides</i><br>spp. | Firmicutes  | <i>Roseburial</i><br><i>E. rectale</i> | <i>Clostridium</i><br>Cluster IV | <i>F.</i><br><i>prausnitzii</i> | <i>E. hallii</i> | <i>Bifidobacte</i><br><i>rium</i> spp. | <i>Enterobac</i><br><i>teriaceae</i> | lactobacilli |
|------------------------------------|-------------|----------------------------|-------------|----------------------------------------|----------------------------------|---------------------------------|------------------|----------------------------------------|--------------------------------------|--------------|
| <b>Stabilization</b>               |             |                            |             |                                        |                                  |                                 |                  |                                        |                                      |              |
| CR                                 | 11.0 ± 0.04 | 10.7 ± 0.1                 | 10.6 ± 0.02 | 10.1 ± 0.1                             | 8.1 ± 0.1                        | n.d.                            | 6.4 ± 0.2        | 7.7 ± 0.3                              | 8.1 ± 0.2                            | 6.0 ± 0.1    |
| TR1                                | 10.6 ± 0.6  | 10.5 ± 0.7                 | 10.2 ± 0.6  | 10.1 ± 0.1                             | 7.7 ± 0.7                        | n.d.                            | 6.3 ± 0.1        | 7.5 ± 0.4                              | 7.7 ± 0.4                            | 6.1 ± 0.1    |
| TR2                                | 10.9 ± 0.03 | 10.7 ± 0.1                 | 10.6 ± 0.1  | 10.1 ± 0.1                             | 8.0 ± 0.1                        | n.d.                            | 6.5 ± 0.2        | 7.7 ± 0.3                              | 7.3 ± 0.1                            | 6.2 ± 0.1    |
| <b>Period 1</b>                    |             |                            |             |                                        |                                  |                                 |                  |                                        |                                      |              |
| CR                                 | 11.0 ± 0.1  | 10.6 ± 0.1                 | 10.7 ± 0.1  | 10.2 ± 0.1                             | 10.1 ± 0.2                       | 6.3 ± 0.2                       | 7.6 ± 0.3        | 7.1 ± 0.1                              | 9.4 ± 0.5                            | 6.4 ± 0.1    |
| TR1 - 300 $\mu\text{M}^{\text{a}}$ | 10.7 ± 0.1* | 9.1 ± 0.2*                 | 10.2 ± 0.1* | 8.9 ± 0.1*                             | 8.0 ± 0.2*                       | 4.1 ± 0.4 <sup>b</sup>          | 6.5 ± 0.1*       | 10.1 ± 0.04*                           | 9.7 ± 0.8                            | 5.2 ± 0.3*   |
| TR2 - High Fe                      | 10.9 ± 0.1  | 10.7 ± 0.2                 | 10.4 ± 0.1* | 9.8 ± 0.1*                             | 9.5 ± 0.4                        | 5.8 ± 0.5                       | 7.8 ± 0.1        | 7.0 ± 0.2                              | 8.8 ± 0.4                            | 6.3 ± 0.2    |
| <b>Period 2</b>                    |             |                            |             |                                        |                                  |                                 |                  |                                        |                                      |              |
| CR                                 | 11.1 ± 0.02 | 10.6 ± 0.1                 | 10.8 ± 0.1  | 10.3 ± 0.1                             | 10.0 ± 0.04                      | 6.4 ± 0.2                       | 7.8 ± 0.1        | 7.0 ± 0.2                              | 9.9 ± 0.7                            | 6.3 ± 0.4    |
| TR1 - 200 $\mu\text{M}^{\text{a}}$ | 11.1 ± 0.1  | 9.5 ± 0.1*                 | 10.9 ± 0.7  | 10.4 ± 0.1                             | 9.6 ± 0.3*                       | 5.8 ± 0.2*                      | 8.8 ± 0.1*       | 9.3 ± 0.1*                             | 9.9 ± 0.4                            | 6.1 ± 0.2    |
| TR2 - 300 $\mu\text{M}^{\text{a}}$ | 10.9 ± 0.1* | 9.7 ± 0.2*                 | 10.6 ± 0.1* | 10.2 ± 0.2                             | 8.5 ± 0.5*                       | 6.6 ± 0.1                       | 8.2 ± 0.1*       | 9.8 ± 0.1*                             | 9.8 ± 0.7                            | 5.8 ± 0.2*   |
| <b>Period 3 - beads</b>            |             |                            |             |                                        |                                  |                                 |                  |                                        |                                      |              |
| CR                                 | 10.8 ± 0.2  | 10.6 ± 0.1                 | 10.8 ± 0.2  | 10.2 ± 0.1                             | 9.2 ± 0.1                        | 7.0 ± 0.1                       | 7.0 ± 0.2        | 6.5 ± 0.2                              | 9.9 ± 0.3                            | 5.9 ± 0.1    |
| TR1 - 200 $\mu\text{M}^{\text{a}}$ | 10.9 ± 0.1  | 10.1 ± 0.2*                | 10.8 ± 0.1  | 10.3 ± 0.03                            | 9.2 ± 0.1                        | 6.0 ± 0.2*                      | 8.1 ± 0.2*       | 9.2 ± 0.1*                             | 9.0 ± 0.2*                           | 5.7 ± 0.2    |
| TR2 - 300 $\mu\text{M}^{\text{a}}$ | 11.0 ± 0.1  | 8.5 ± 0.5*                 | 10.6 ± 0.1  | 9.6 ± 0.1*                             | 5.5 ± 0.2*                       | 4.4 ± 0.1*                      | 7.6 ± 0.2*       | 10.2 ± 0.1*                            | 10.3 ± 0.3                           | 4.9 ± 0.3*   |

Data are means ± SD of the last 3 days of each fermentation period. Means with an asterisk (\*) are significantly different from control reactor (CR) within the same bacterial group,  $P < 0.05$ .

n.d., not detected

<sup>a</sup> 2,2'-dipyridyl concentrations in the feed medium of the reactors.

<sup>b</sup> one of three values below detection limit.
